# Supplementary material for: Low- and High-Pressure Membrane Separation in the Production of Process Water for Coke Quenching
Source: MDPI journal article supplement (doi:10.3390/membranes11120937), 2021-11-27
Supplement: s1 [file s1]

|              |              |              |             |             |             |             |             |             |
|--------------|--------------|--------------|-------------|-------------|-------------|-------------|-------------|-------------|
| Median D     | 0.038        |              |             |             | Mean V      | 0.039       |             |             |
| Modal D      | 0.035        |              |             |             | Std Dev     | 0.077       |             |             |
| 25.000%D(μm) | 50.000%D(μm) | 75.000%D(μm) | 0.000%D(μm) | 0.000%D(μm) | 0.000%D(μm) | 0.000%D(μm) | 0.000%D(μm) | 0.000%D(μm) |
| 0.045        | 0.038        | 0.034        | 0.000       | 0.000       | 0.000       | 0.000       | 0.000       | 0.000       |

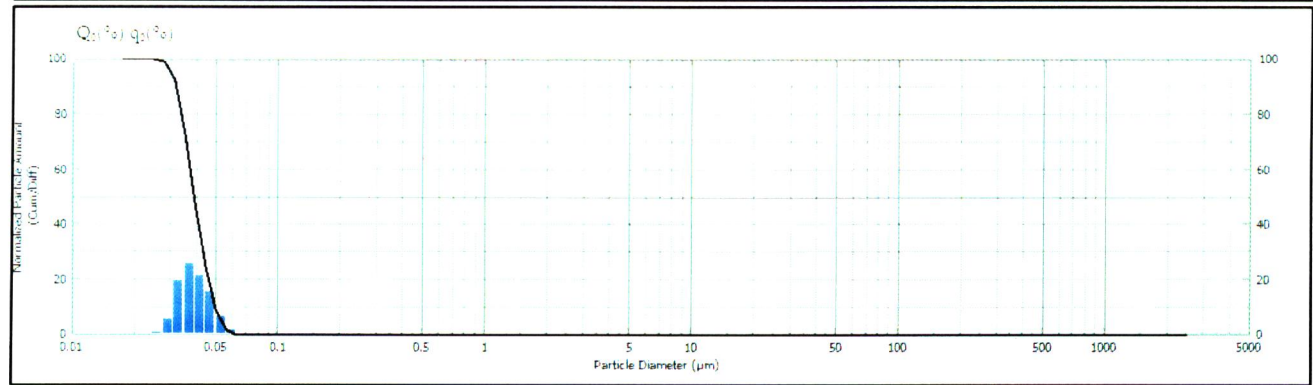

|    | Diam<br>x(μm) | Cum%<br>Q0(%) | Diff%<br>q0(%) |    | Diam<br>x(μm) | Cum%<br>Q0(%) | Diff%<br>q0(%) |    | Diam<br>x(μm) | Cum%<br>Q0(%) | Diff%<br>q0(%) |     | Diam<br>x(μm) | Cum%<br>Q0(%) | Diff%<br>q0(%) |
|----|---------------|---------------|----------------|----|---------------|---------------|----------------|----|---------------|---------------|----------------|-----|---------------|---------------|----------------|
| 1  | 2500.000      | 0.000         | 0.000          | 27 | 113.342       | 0.000         | 0.000          | 53 | 5.139         | 0.000         | 0.000          | 79  | 0.233         | 0.000         | 0.000          |
| 2  | 2219.551      | 0.000         | 0.000          | 28 | 100.628       | 0.000         | 0.000          | 54 | 4.562         | 0.000         | 0.000          | 80  | 0.207         | 0.000         | 0.000          |
| 3  | 1970.562      | 0.000         | 0.000          | 29 | 89.339        | 0.000         | 0.000          | 55 | 4.050         | 0.000         | 0.000          | 81  | 0.184         | 0.000         | 0.000          |
| 4  | 1749.505      | 0.000         | 0.000          | 30 | 79.317        | 0.000         | 0.000          | 56 | 3.596         | 0.000         | 0.000          | 82  | 0.163         | 0.000         | 0.000          |
| 5  | 1553.246      | 0.000         | 0.000          | 31 | 70.419        | 0.000         | 0.000          | 57 | 3.193         | 0.000         | 0.000          | 83  | 0.145         | 0.000         | 0.000          |
| 6  | 1379.004      | 0.000         | 0.000          | 32 | 62.520        | 0.000         | 0.000          | 58 | 2.834         | 0.000         | 0.000          | 84  | 0.129         | 0.000         | 0.000          |
| 7  | 1224.308      | 0.000         | 0.000          | 33 | 55.506        | 0.000         | 0.000          | 59 | 2.516         | 0.000         | 0.000          | 85  | 0.114         | 0.000         | 0.000          |
| 8  | 1086.965      | 0.000         | 0.000          | 34 | 49.280        | 0.000         | 0.000          | 60 | 2.234         | 0.000         | 0.000          | 86  | 0.101         | 0.000         | 0.000          |
| 9  | 965.030       | 0.000         | 0.000          | 35 | 43.752        | 0.000         | 0.000          | 61 | 1.984         | 0.000         | 0.000          | 87  | 0.090         | 0.000         | 0.000          |
| 10 | 856.773       | 0.000         | 0.000          | 36 | 38.843        | 0.000         | 0.000          | 62 | 1.761         | 0.000         | 0.000          | 88  | 0.080         | 0.000         | 0.000          |
| 11 | 760.661       | 0.000         | 0.000          | 37 | 34.486        | 0.000         | 0.000          | 63 | 1.563         | 0.000         | 0.000          | 89  | 0.071         | 0.000         | 0.009          |
| 12 | 675.330       | 0.000         | 0.000          | 38 | 30.617        | 0.000         | 0.000          | 64 | 1.388         | 0.000         | 0.000          | 90  | 0.063         | 0.009         | 1.967          |
| 13 | 599.572       | 0.000         | 0.000          | 39 | 27.183        | 0.000         | 0.000          | 65 | 1.232         | 0.000         | 0.000          | 91  | 0.056         | 1.976         | 7.000          |
| 14 | 532.312       | 0.000         | 0.000          | 40 | 24.133        | 0.000         | 0.000          | 66 | 1.094         | 0.000         | 0.000          | 92  | 0.050         | 8.976         | 16.038         |
| 15 | 472.597       | 0.000         | 0.000          | 41 | 21.426        | 0.000         | 0.000          | 67 | 0.971         | 0.000         | 0.000          | 93  | 0.044         | 25.014        | 21.570         |
| 16 | 419.582       | 0.000         | 0.000          | 42 | 19.023        | 0.000         | 0.000          | 68 | 0.862         | 0.000         | 0.000          | 94  | 0.039         | 46.583        | 26.063         |
| 17 | 372.513       | 0.000         | 0.000          | 43 | 16.889        | 0.000         | 0.000          | 69 | 0.766         | 0.000         | 0.000          | 95  | 0.035         | 72.647        | 20.006         |
| 18 | 330.725       | 0.000         | 0.000          | 44 | 14.994        | 0.000         | 0.000          | 70 | 0.680         | 0.000         | 0.000          | 96  | 0.031         | 92.652        | 6.341          |
| 19 | 293.624       | 0.000         | 0.000          | 45 | 13.312        | 0.000         | 0.000          | 71 | 0.604         | 0.000         | 0.000          | 97  | 0.027         | 98.993        | 1.007          |
| 20 | 260.685       | 0.000         | 0.000          | 46 | 11.819        | 0.000         | 0.000          | 72 | 0.536         | 0.000         | 0.000          | 98  | 0.024         | 100.000       | 0.000          |
| 21 | 231.442       | 0.000         | 0.000          | 47 | 10.493        | 0.000         | 0.000          | 73 | 0.476         | 0.000         | 0.000          | 99  | 0.022         | 100.000       | 0.000          |
| 22 | 205.479       | 0.000         | 0.000          | 48 | 9.316         | 0.000         | 0.000          | 74 | 0.422         | 0.000         | 0.000          | 100 | 0.019         | 100.000       | 0.000          |
| 23 | 182.428       | 0.000         | 0.000          | 49 | 8.271         | 0.000         | 0.000          | 75 | 0.375         | 0.000         | 0.000          | 101 | 0.017         | 100.000       | 0.000          |
| 24 | 161.963       | 0.000         | 0.000          | 50 | 7.343         | 0.000         | 0.000          | 76 | 0.333         | 0.000         | 0.000          |     |               |               |                |
| 25 | 143.794       | 0.000         | 0.000          | 51 | 6.519         | 0.000         | 0.000          | 77 | 0.296         | 0.000         | 0.000          |     |               |               |                |
| 26 | 127.664       | 0.000         | 0.000          | 52 | 5.788         | 0.000         | 0.000          | 78 | 0.262         | 0.000         | 0.000          |     |               |               |                |

|                        |            |  |                   |                 |   |
|------------------------|------------|--|-------------------|-----------------|---|
| Condition File Name    |            |  |                   |                 |   |
| Ref Index              | 1.60-1.00i |  |                   |                 |   |
| Decentralized Solvent  |            |  | Dispersing Agent  |                 |   |
| Dens of Disper Agent   |            |  | Dispersion Method |                 |   |
| Stir Speed             | Fast       |  |                   |                 |   |
| Sample Preparation     |            |  |                   |                 |   |
| Distribution Function  | None       |  |                   | Smoothing Level | 0 |
| Select Emulation Table |            |  |                   | Data Shift      | 0 |
| Sequence File Name     |            |  |                   |                 |   |
