# Supplementary material for: Low- and High-Pressure Membrane Separation in the Production of Process Water for Coke Quenching
Source: MDPI journal article supplement (doi:10.3390/membranes11120937), 2021-11-27
Supplement: s1 [file s1]

Article

# Low- and High-Pressure Membrane Separation in the Production of Process Water for Coke Quenching

Anna Trusek <sup>1,\*</sup>, Maciej Wajsprych <sup>1</sup> and Andrzej Noworyta <sup>1</sup>

<sup>1</sup> Division of Bioprocess, Department of Chemistry, Wrocław University of Science and Technology, Micro- and Nanoengineering, Wybrzeże Wyspiańskiego 27, 50-370 Wrocław, Poland; maciej.wajsprych@gmail.com (M.W.); andrzej.noworyta@pwr.edu.pl (A.N.)

\* Correspondence: anna.trusek@pwr.edu.pl; Tel.: +48-71-320-2653

## Supplementary Materials

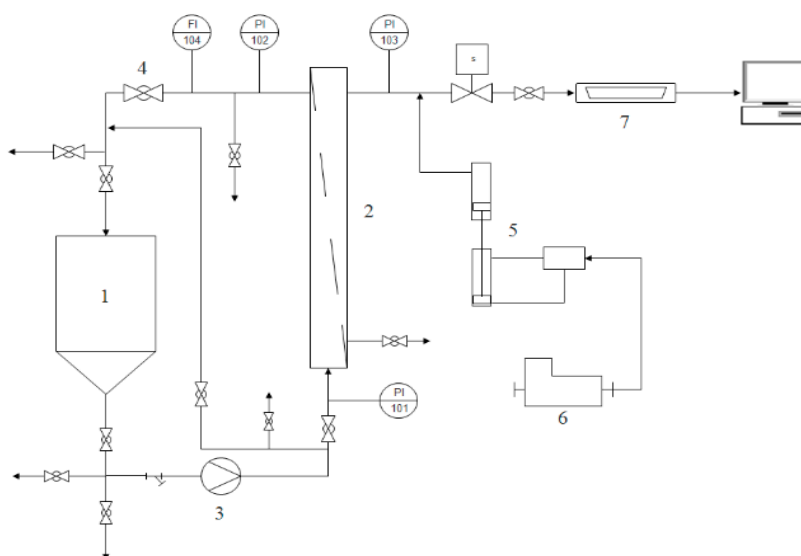

**Citation:** Trusek, A.; Wajsprych, M.; Noworyta, A. Low- and High-Pressure Membrane Separation in the Production of Process Water for Coke Quenching. *Membranes* **2021**, *11*, 937. <https://doi.org/10.3390/membranes11120937>

Academic Editor: Marek Gryta

Received: 6 November 2021

Accepted: 25 November 2021

Published: 27 November 2021

**Publisher's Note:** MDPI stays neutral with regard to jurisdictional claims in published maps and institutional affiliations.

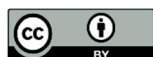

**Copyright:** © 2021 by the authors. Licensee MDPI, Basel, Switzerland. This article is an open access article distributed under the terms and conditions of the Creative Commons Attribution (CC BY) license (<https://creativecommons.org/licenses/by/4.0/>).

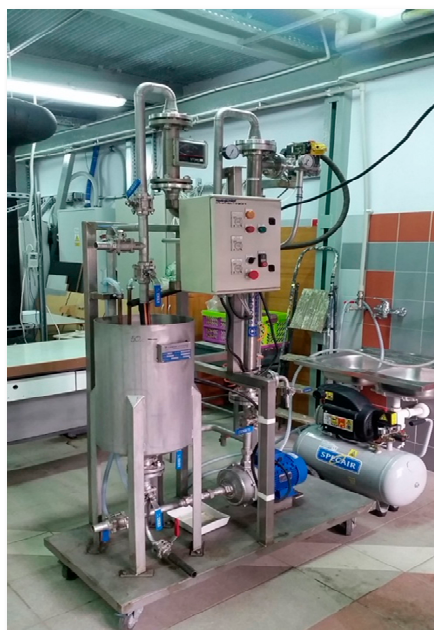

**Figure S1.** The pilot installation of Le Carbon Lorraine for low pressure driven membrane filtration: 1- feed water tank, 2 – membrane module, 3 – recirculation pump, 4 – valve, 5 – backflushing system, 6 – compressor, 7 – weight.

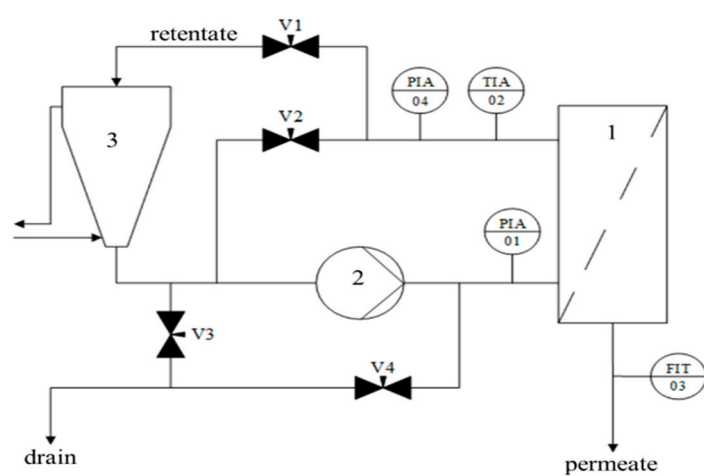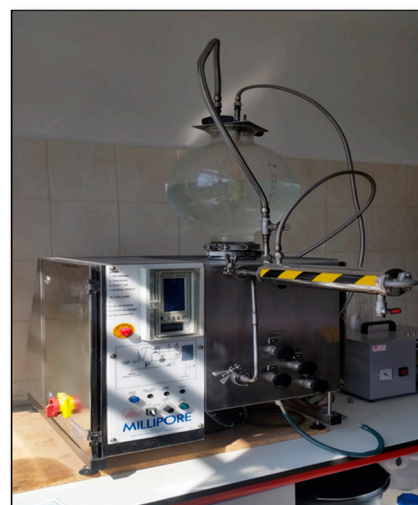

**Figure S2.** The pilot installation of Millipore for high pressure membrane filtration; 1 – membrane module, 2 – membrane pump, 3 – tank.
